# Supplementary material for: Blood biomarkers in early bacterial infection and sepsis diagnostics in feverish young children
Source: PubMed Central journal article supplement (PMC9108404; doi:10.7150/ijms.69859), 2022-04-11
Supplement: ijmsv19p0753s1.pdf [file ijmsv19p0753s1.pdf]

Supplementary material

**Table S1.** Univariate and multivariate logistic regression models to predict bacterial infection

|   |          | Univariate logistic regression   |       |        |       |            | 95% CI |         |
|---|----------|----------------------------------|-------|--------|-------|------------|--------|---------|
|   |          | Coeff. B                         | S.E.  | Wald   | p     | Odds ratio | Lower  | Upper   |
| 1 | WBC      | 0.21                             | 0.06  | 13.55  | <0.05 | 1.24       | 1.11   | 1.39    |
|   | constant | -3.02                            | 0.76  | 15.87  | <0.05 | 0.05       |        |         |
| 2 | NC       | 0.27                             | 0.07  | 14.97  | <0.05 | 1.31       | 1.14   | 1.50    |
|   | Constant | -2,50                            | 0.60  | 17.48  | <0.05 | 0.08       |        |         |
| 3 | CRP      | 0.08                             | 0.02  | 10.35  | <0.05 | 1.08       | 1.03   | 1.13    |
|   | Constant | -1.41                            | 0.37  | 14.28  | <0.05 | 0.24       |        |         |
| 4 | IL-2     | 3.01                             | 1.85  | 2.64   | 0.1   | 20.31      | 0.54   | 768.93  |
|   | Constant | -0.76                            | 0.28  | 7.32   | <0.05 | 0.47       |        |         |
| 5 | IL-6     | 0.09                             | 0.04  | 3.83   | <0.05 | 1.09       | 1.00   | 1.19    |
|   | Constant | -0.89                            | 0.32  | 7.73   | <0.05 | 0.41       |        |         |
|   |          | Multivariate logistic regression |       |        |       |            | 95% CI |         |
|   |          | Coeff. B                         | S.E.  | Wald   | p     | Odds ratio | Lower  | Upper   |
| 1 | NC       | 0.14                             | 0.17  | 0.67   | 0.41  | 1.15       | 0.83   | 1.59    |
|   | CRP      | 0.06                             | 0.03  | 4.29   | 0.04  | 1.06       | 1.00   | 1.12    |
|   | WBC      | 0.13                             | 0.16  | 0.75   | 0.39  | 1.14       | 0.84   | 1.55    |
|   | IL-2     | 2.20                             | 1.69  | 1.70   | 0.19  | 9.00       | 0.33   | 244.94  |
|   | IL-6     | 0.05                             | 0.06  | 0.71   | 0.40  | 1.05       | 0.93   | 1.19    |
|   | Constant | -4.50                            | 1.25  | 13.05  | 0.00  | 0.01       |        |         |
| 2 | WBC      | 0.09                             | 0.12  | 0.52   | 0.47  | 1.09       | 0.86   | 1.39    |
|   | NC       | 0.19                             | 0.14  | 1.82   | 0.18  | 1.21       | 0.92   | 1.59    |
|   | IL-2     | 2.44                             | 1.92  | 1.61   | 0.20  | 11.45      | 0.26   | 496.90  |
|   | Constant | -3.35                            | 0.91  | 13.47  | 0     | 0.04       |        |         |
| 3 | WBC      | 0.065                            | 0.136 | 0.227  | 0.634 | 1.067      | 0.817  | 1.393   |
|   | NC       | 0.191                            | 0.149 | 1.637  | 0.201 | 1.210      | 0.904  | 1.620   |
|   | CRP      | 0.062                            | 0.026 | 5.695  | 0.017 | 1.064      | 1.011  | 1.119   |
|   | Constant | -3.483                           | 1.002 | 12.077 | 0.001 | 0.031      |        |         |
| 4 | NC       | 0.136                            | 0.166 | 0.666  | 0.414 | 1.145      | 0.827  | 1.586   |
|   | CRP      | 0.057                            | 0.028 | 4.288  | 0.038 | 1.059      | 1.003  | 1.118   |
|   | WBC      | 0.135                            | 0.155 | 0.752  | 0.386 | 1.144      | 0.844  | 1.551   |
|   | IL-2     | 2.197                            | 1.686 | 1.699  | 0.192 | 9.001      | 0.331  | 244.936 |
|   | IL-6     | 0.053                            | 0.063 | 0.713  | 0.398 | 1.055      | 0.932  | 1.194   |
|   | Constant | -4.503                           | 1.247 | 13.047 | 0.000 | 0.011      |        |         |

WBC – leukocytes; NC – neutrophil count; CRP – C reactive protein; iNOS – inducible nitric oxide synthase; IL – interleukin; S.E. – standard error; C.I. – confidence intervals

**Table S2.** Univariate and multivariate logistic regression models to predict sepsis

|  | Univariate logistic regression | 95% CI |
|--|--------------------------------|--------|
|--|--------------------------------|--------|

|                                         |          | Coeff. B | S.E.  | Wald   | p     | Odds ratio | Lower  | Upper |
|-----------------------------------------|----------|----------|-------|--------|-------|------------|--------|-------|
| 1                                       | CRP      | 0.031    | 0.014 | 4.913  | 0.027 | 1.032      | 1.004  | 1.061 |
|                                         | constant | -3.841   | 0.818 | 22.064 | 0     | 0.021      |        |       |
| 2                                       | IL-10    | 0.003    | 0.002 | 2.566  | 0.109 | 1.003      | 0.999  | 1.008 |
|                                         | Constant | -3.175   | 0.610 | 27.044 | 0     | 0.042      |        |       |
| <b>Multivariate logistic regression</b> |          |          |       |        |       |            | 95% CI |       |
|                                         |          | Coeff. B | S.E.  | Wald   | p     | Odds ratio | Lower  | Upper |
| 1                                       | CRP      | 0.04     | 0.02  | 4.93   | 0.03  | 1.04       | 1.00   | 1.07  |
|                                         | IL-10    | 0        | 0     | 2.18   | 0.14  | 1.00       | 1.00   | 1.01  |
|                                         | Constant | -4.67    | 1.15  | 16.52  | 0     | 0.01       |        |       |

CRP – C reactive protein; IL – interleukin; S.E. – standard error; C.I. – confidence intervals

**Table S3.** Extended Table 4 (receiver-operating characteristic curve analysis and diagnostic performance of different biomarkers and their combinations) with positive and negative predictive values.

|                                      | <i>Biomarker</i>                | <i>ROC AUC<br/>(CI 95%)</i> | <i>Youden<br/>Index J</i> | <i>Optimal<br/>Cut-Off</i> | <i>Se,<br/>%</i> | <i>Sp,<br/>%</i> | <i>PPV<br/>%</i> | <i>NPV<br/>%</i> |
|--------------------------------------|---------------------------------|-----------------------------|---------------------------|----------------------------|------------------|------------------|------------------|------------------|
| <i>BI vs<br/>VI</i>                  | WBC                             | 0.796 (0.683-0.883)         | 0.631                     | 10                         | 89               | 74               | 69               | 91               |
|                                      | NC                              | 0.821 (0.711-0.902)         | 0.571                     | 7                          | 79               | 79               | 71               | 85               |
|                                      | CRP                             | 0.770 (0.653-0.862)         | 0.488                     | 12                         | 60               | 88               | 77               | 77               |
|                                      | WBC + NC + CRP                  | 0.884 (0.786-0.948)         | 0.702                     | 0.340                      | 89               | 81               | 64               | 88               |
|                                      | IL-2                            | 0.610 (0.486-0.724)         | 0.286                     | 0.3                        | 28               | 100              | 100              | 68               |
|                                      | IL-6                            | 0.700 (0.578-0.804)         | 0.370                     | 2                          | 68               | 69               | 60               | 76               |
|                                      | sTREM-1                         | 0.656 (0.533-0.766)         | 0.393                     | 18                         | 54               | 86               | 71               | 74               |
|                                      | WBC + NC + IL-2                 | 0.863 (0.759-0.933)         | 0.655                     | 0.327                      | 82               | 83               | 68               | 90               |
|                                      | WBC + NC + IL-2 +<br>IL-6       | 0.880 (0.780-946)           | 0.655                     | 0.320                      | 82               | 83               | 71               | 93               |
|                                      | WBC + NC + CRP<br>+ IL-2 + IL-6 | 0.942 (0.859-0.984)         | 0.774                     | 0.326                      | 96               | 81               | 75               | 95               |
| <i>Sepsis<br/>vs non-<br/>sepsis</i> | CRP                             | 0.807 (0.695-0.891)         | 0.523                     | 17                         | 75               | 77               | 16               | 98               |
|                                      | IL-10                           | 0.837 (0.730-0.915)         | 0.735                     | 14                         | 75               | 98               | 75               | 98               |
|                                      | IL-10 + CRP                     | 0.860 (0.756-0.931)         | 0.735                     | 0.312                      | 75               | 98               | 50               | 98               |

BI – bacterial infection; VI – viral infection; WBC – leukocytes; NC – neutrophil count; CRP – C reactive protein; IL – interleukin; sTREM-1 - soluble triggering receptor expressed on myeloid cells 1; AUC – area under curve; Se – sensitivity; Sp – specificity; PPV – positive predictive value; NPV – negative predictive value
